# Supplementary material
Source: publisher site journal article supplement (https://www.spandidos-publications.com/2888/downloadSupplementary)

Figure S1. AQP5 overexpression is present with a high efficiency. The expression of AQP5 in HepG2.2.15 and Huh7-1.3 cells transfected with AQP5 or vector was detected by western blotting. \* $P < 0.05$ . AQP5, aquaporin 5.

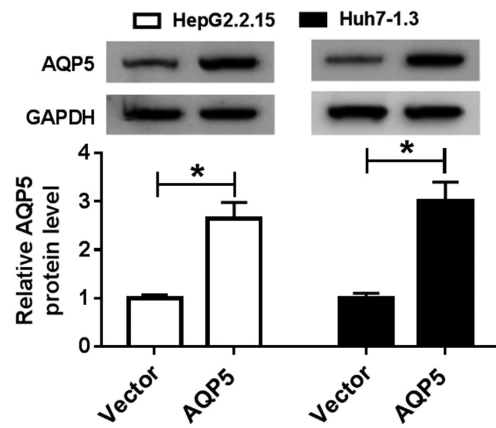

Supplement: Supplementary file 1 [file downloadSupplementary]
